# Supplementary material for: Observations on hygroscopic growth and phase transitions of mixed 1, 2, 6-hexanetriol ∕ (NH 4 ) 2 SO 4 particles: investigation of the liquid–liquid phase separation (LLPS) dynamic process and mechanism and secondary LLPS during the dehumidification
Source: Copernicus journal article supplement (doi:10.5194/acp-21-9705-2021), 2021-06-29
Supplement: Supplementary file 1 [file acp-21-9705-2021-supplement.zip]

Archive with 17 entries (16 files):
- acp-21-9705-2021-supplement-title-page.pdf
- Supplement/
- Supplement/Movie S2.avi
- Supplement/Movie S11.avi
- Supplement/Movie S9.avi
- Supplement/Movie S8.avi
- Supplement/Supplement.docx
- Supplement/Movie S14.avi
- Supplement/Movie S3.avi
- Supplement/Movie S6.avi
- Supplement/Movie S10.avi
- Supplement/Movie S4.avi
- Supplement/Movie S7.avi
- Supplement/Movie S5.avi
- Supplement/Movie S12.avi
- Supplement/Movie S13.avi
- Supplement/Movie S1.avi
