# Supplementary material for: Observations on hygroscopic growth and phase transitions of mixed 1, 2, 6-hexanetriol ∕ (NH 4 ) 2 SO 4 particles: investigation of the liquid–liquid phase separation (LLPS) dynamic process and mechanism and secondary LLPS during the dehumidification
Source: Copernicus journal article supplement (doi:10.5194/acp-21-9705-2021), 2021-06-29
Supplement: Supplementary file 1 [file acp-21-9705-2021-supplement.zip › acp-21-9705-2021-supplement-title-page.pdf]

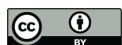

## *Supplement of*

# **Observations on hygroscopic growth and phase transitions of mixed 1, 2, 6-hexanetriol / $(\text{NH}_4)_2\text{SO}_4$ particles: investigation of the liquid–liquid phase separation (LLPS) dynamic process and mechanism and secondary LLPS during the dehumidification**

**Shuaishuai Ma et al.**

*Correspondence to:* Shufeng Pang (sfpang@bit.edu.cn) and Yunhong Zhang (yhz@bit.edu.cn)

- acp-21-9705-2021-supplement-title-page.pdf
- Supplement
  - Movie S1.avi
  - Movie S10.avi
  - Movie S11.avi
  - Movie S12.avi
  - Movie S13.avi
  - Movie S14.avi
  - Movie S2.avi
  - Movie S3.avi
  - Movie S4.avi
  - Movie S5.avi
  - Movie S6.avi
  - Movie S7.avi
  - Movie S8.avi
  - Movie S9.avi
  - Supplement.docx

The copyright of individual parts of the supplement might differ from the article licence.
