# Supplementary material for: Observations on hygroscopic growth and phase transitions of mixed 1, 2, 6-hexanetriol ∕ (NH 4 ) 2 SO 4 particles: investigation of the liquid–liquid phase separation (LLPS) dynamic process and mechanism and secondary LLPS during the dehumidification
Source: Copernicus journal article supplement (doi:10.5194/acp-21-9705-2021), 2021-06-29
Supplement: Supplementary file 1 [file acp-21-9705-2021-supplement.zip › Supplement/Supplement.docx]

**Supplement of**

## Observations on hygroscopic growth and phase transitions of 1, 2, 6-hexanetriol/(NH4)2SO4 mixed particles: Investigation of liquid-liquid phase separation (LLPS) dynamic process and mechanism and secondary LLPS during the dehumidification

Shuaishuai Ma, Zhe Chen, Shufeng Pang[[1]](#footnote-1)*, Yunhong Zhang[[2]](#footnote-2)*

*The Institute of Chemical Physics, School of Chemistry and Chemical Engineering, Beijing Institute of Technology. Beijing 100081, People’s Republic of China*

**Fig. S1.** Hygroscopic cycle of pure 1, 2, 6-hexanetriol particle.

**Fig. S2.** SRH, ERH and DRH of OIR = 1:1 particles with different particle diameters of 25-87 μm (~90% RH).


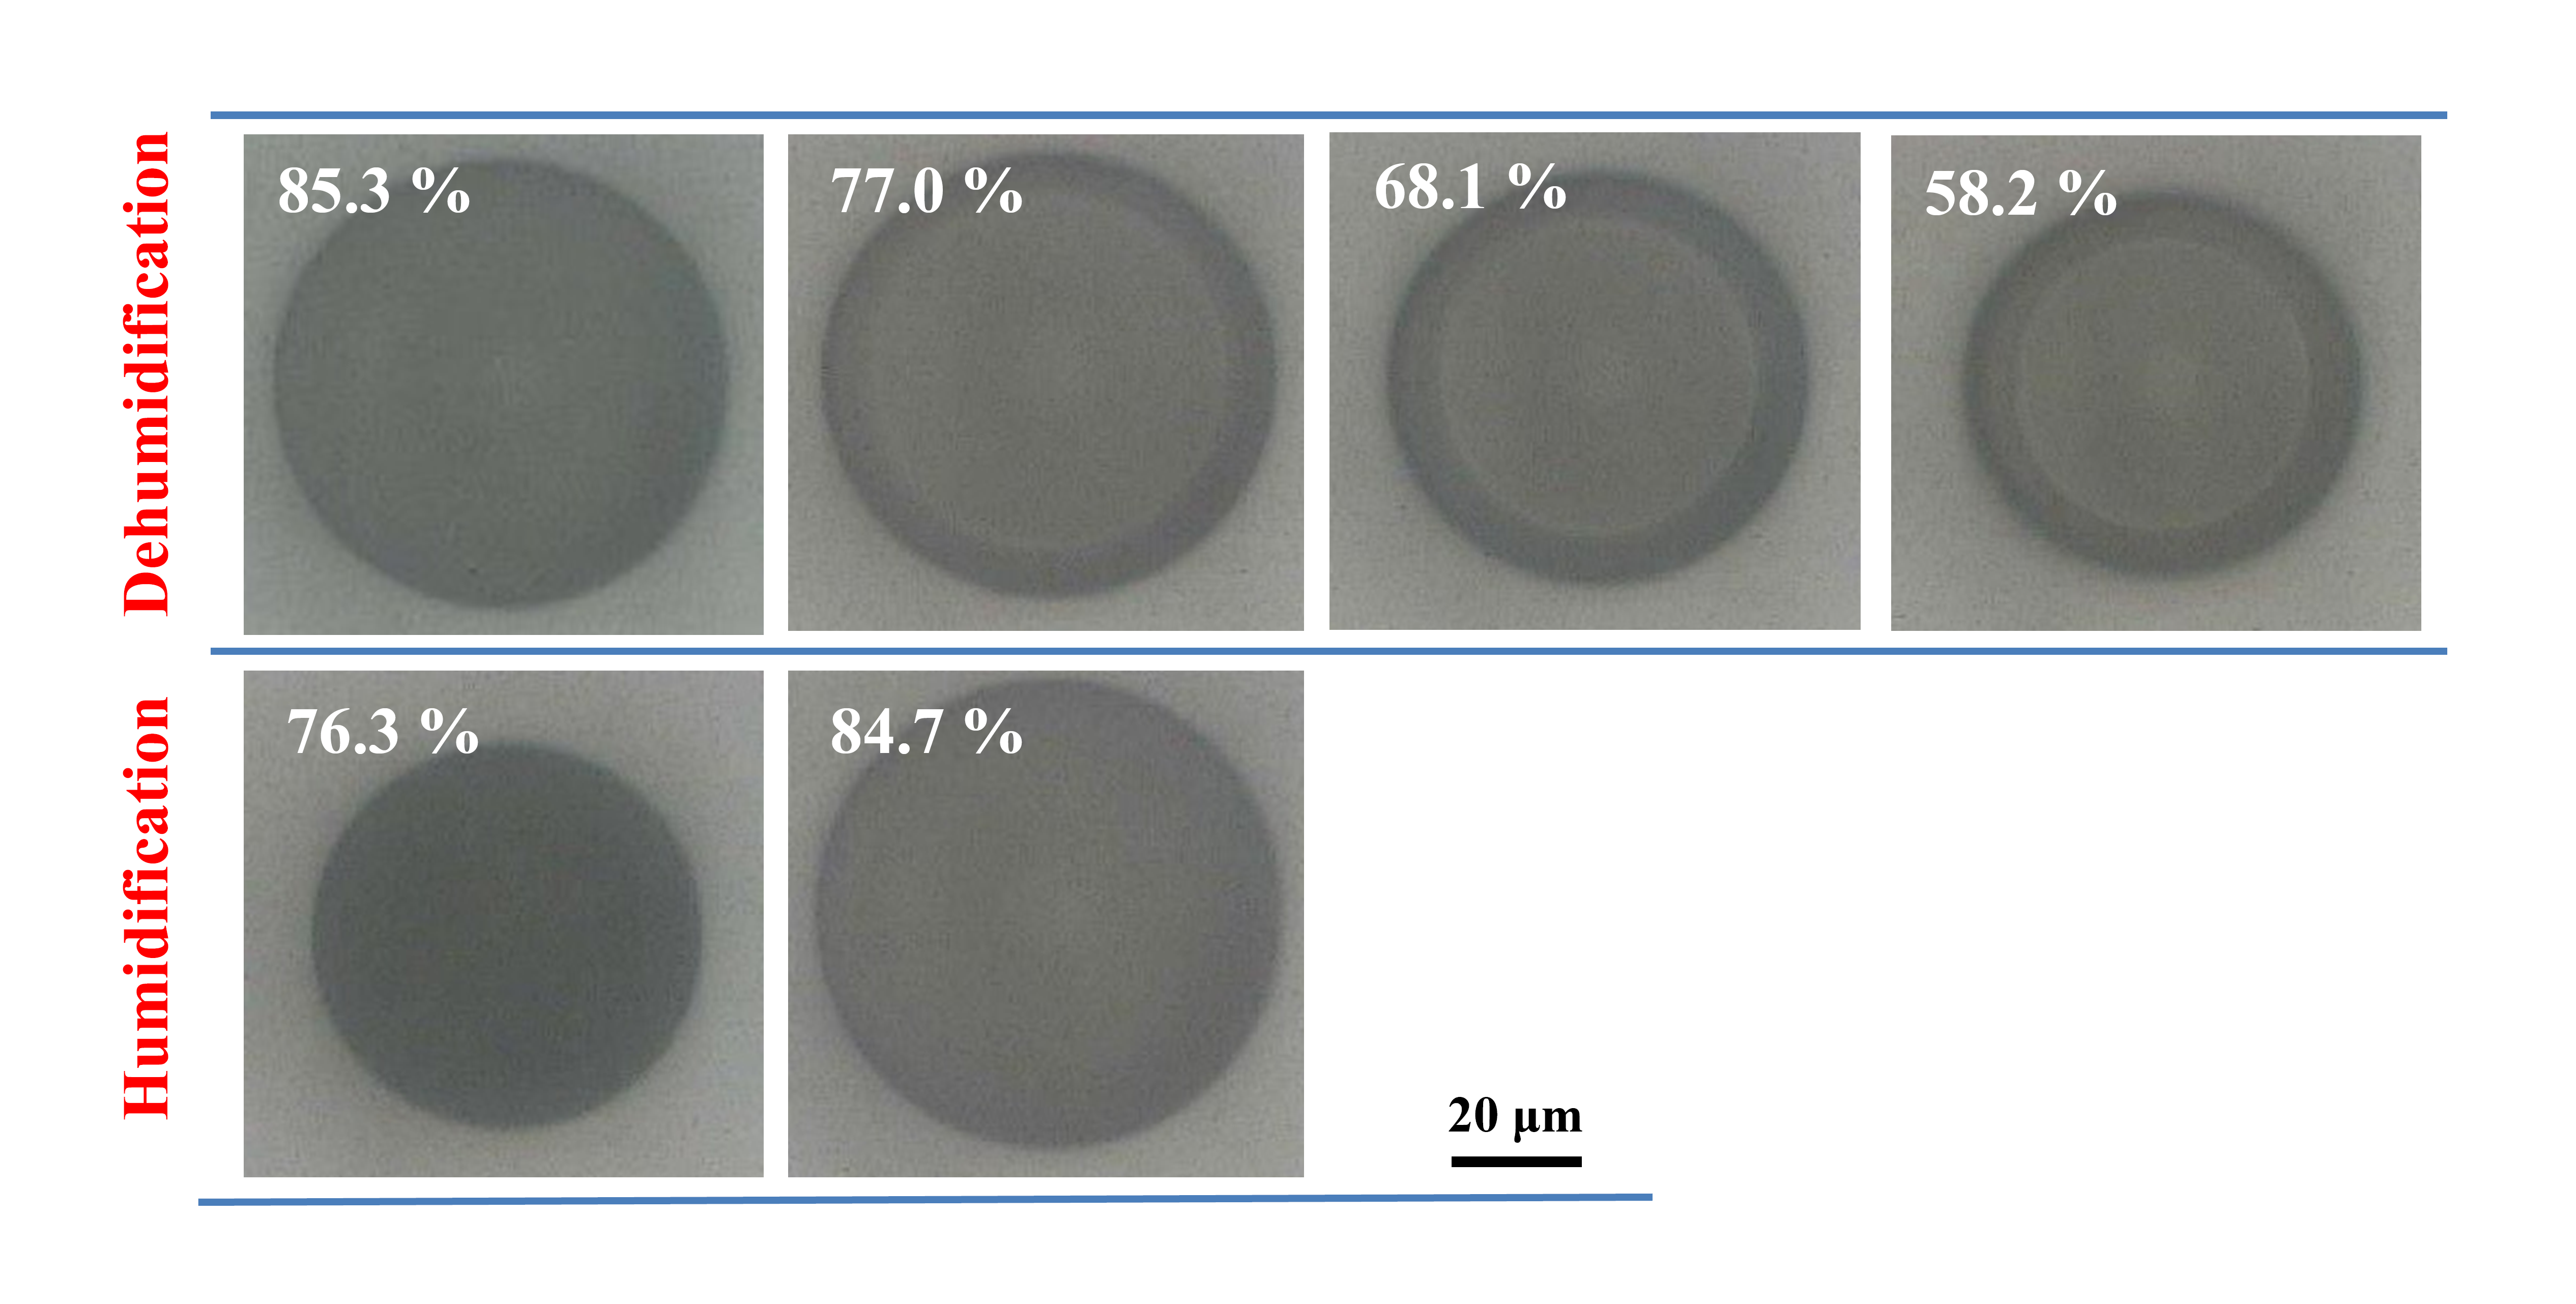


**Fig. S3.** Optical images of the OIR = 1:1 particle during a RH cycle by the Leica DMLM microscope.


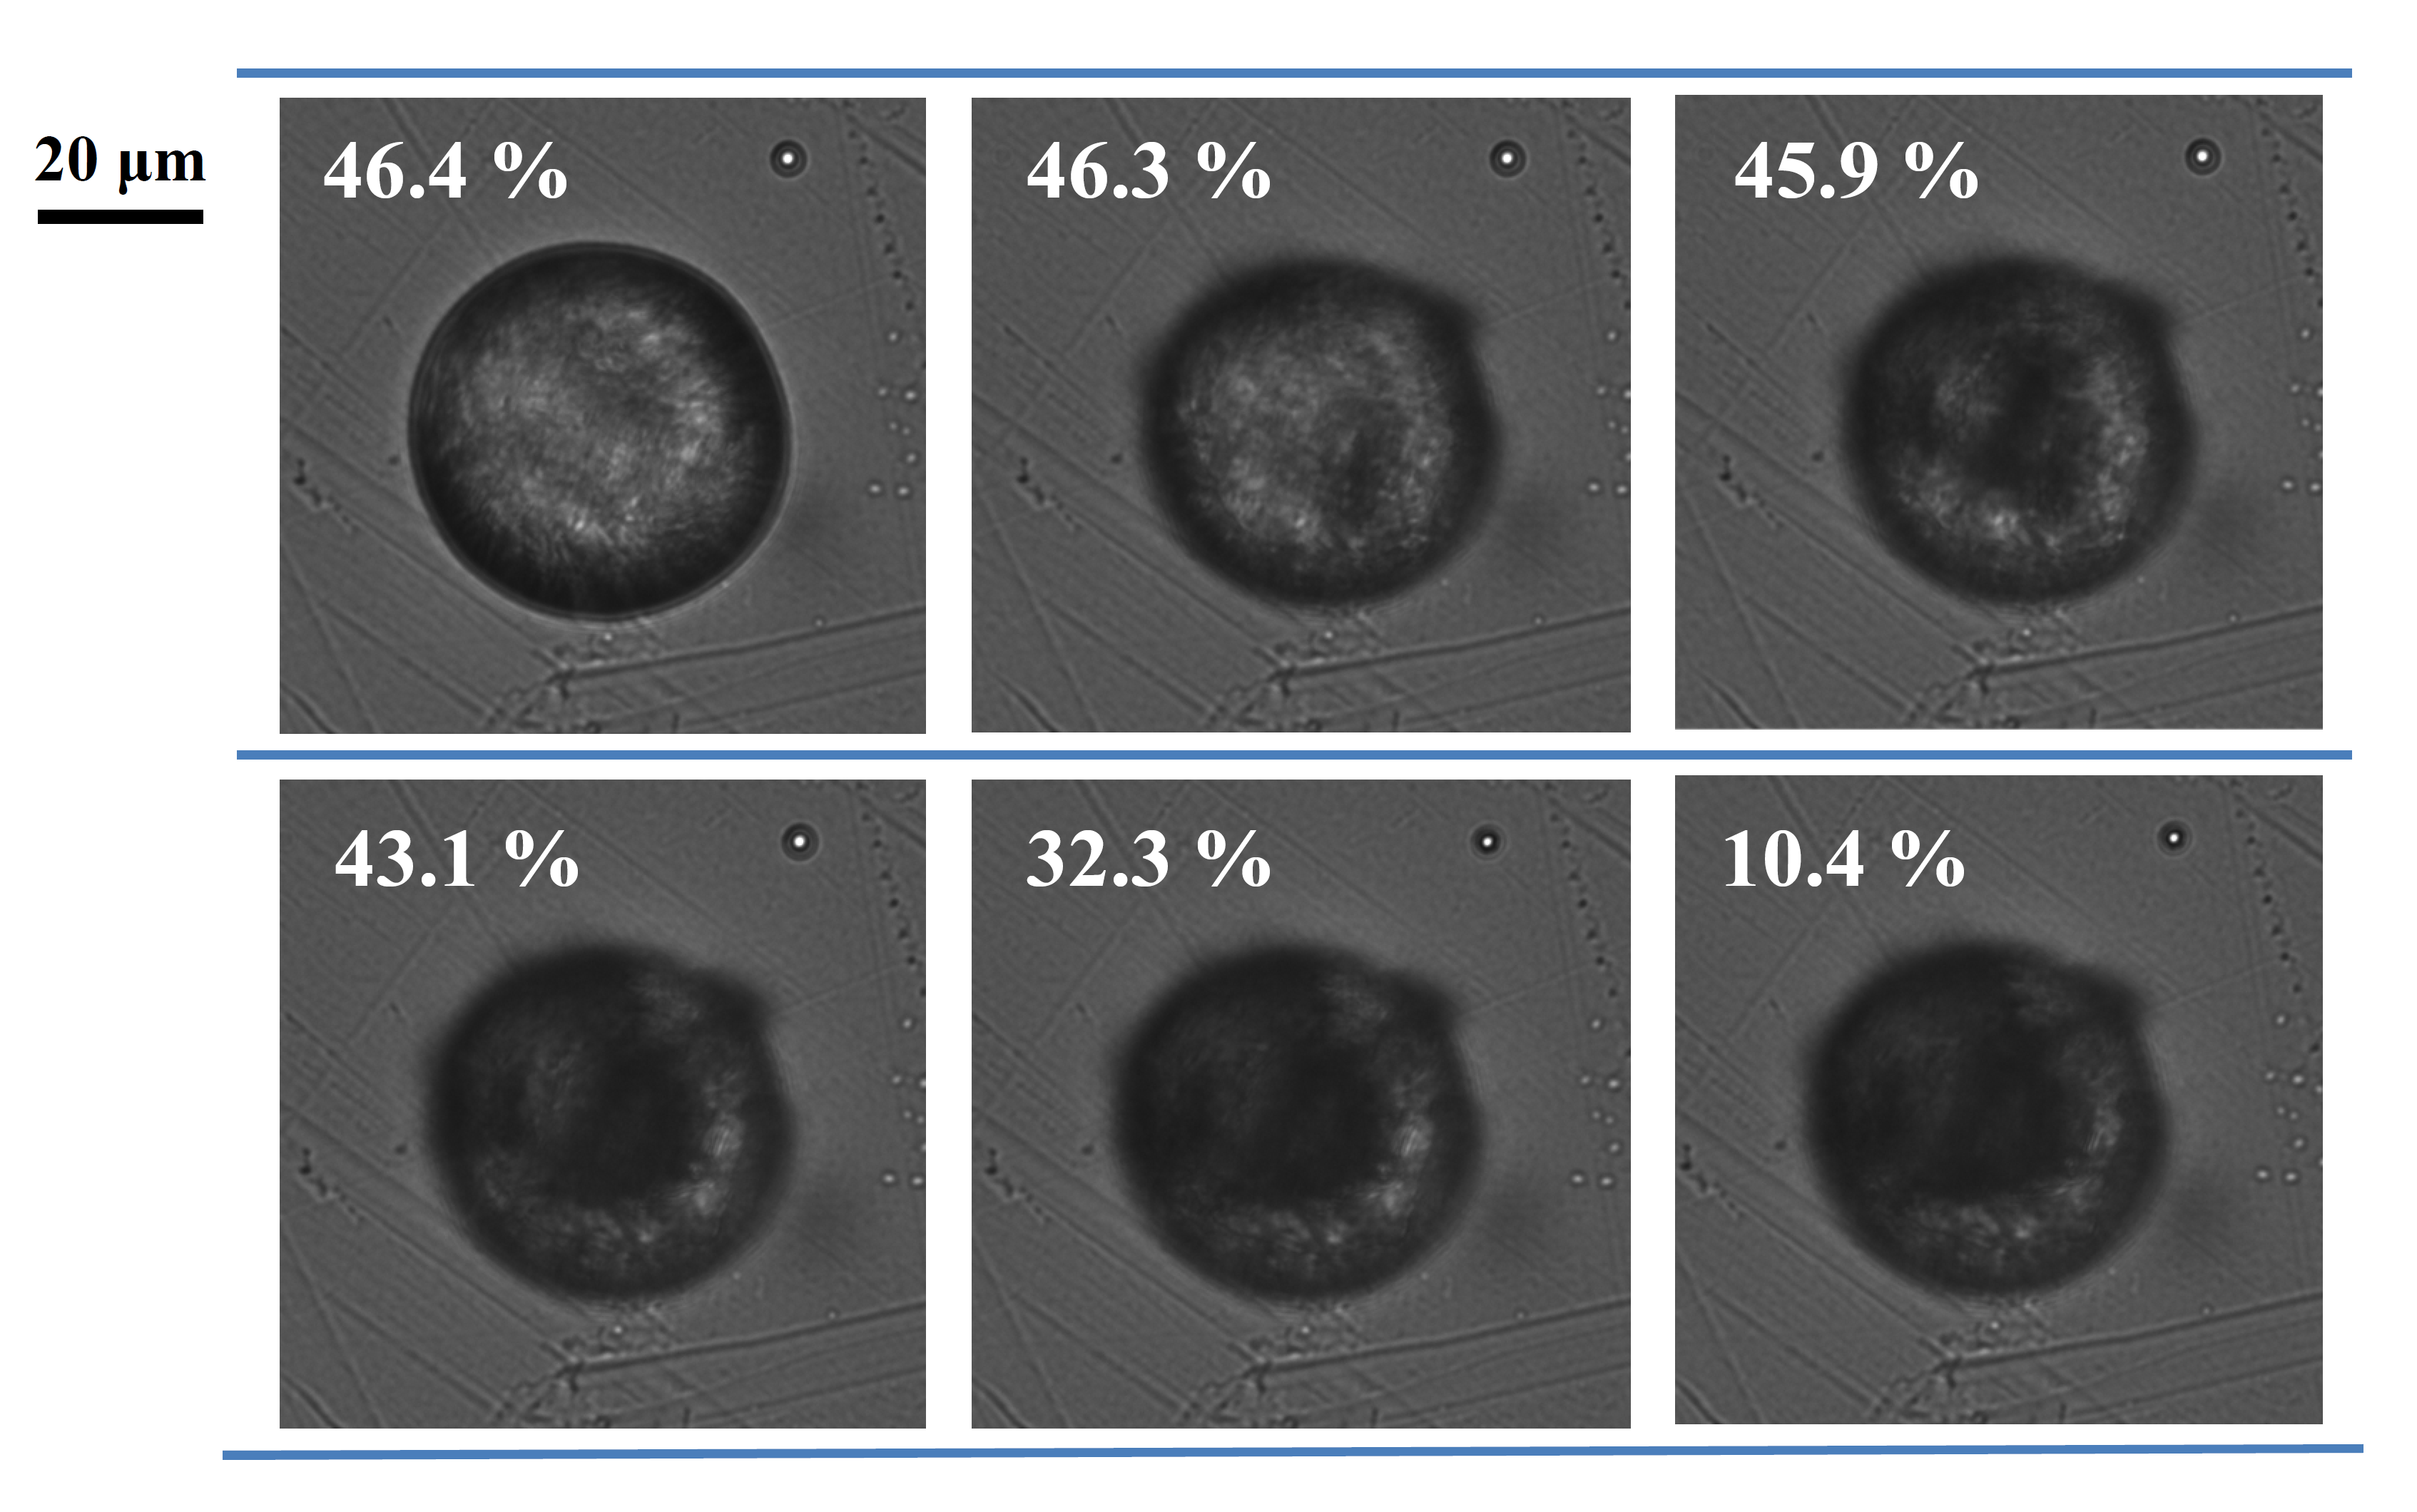


**Fig. S4.** Morphology changes of the OIR = 1:4 particle during and after efflorescence.


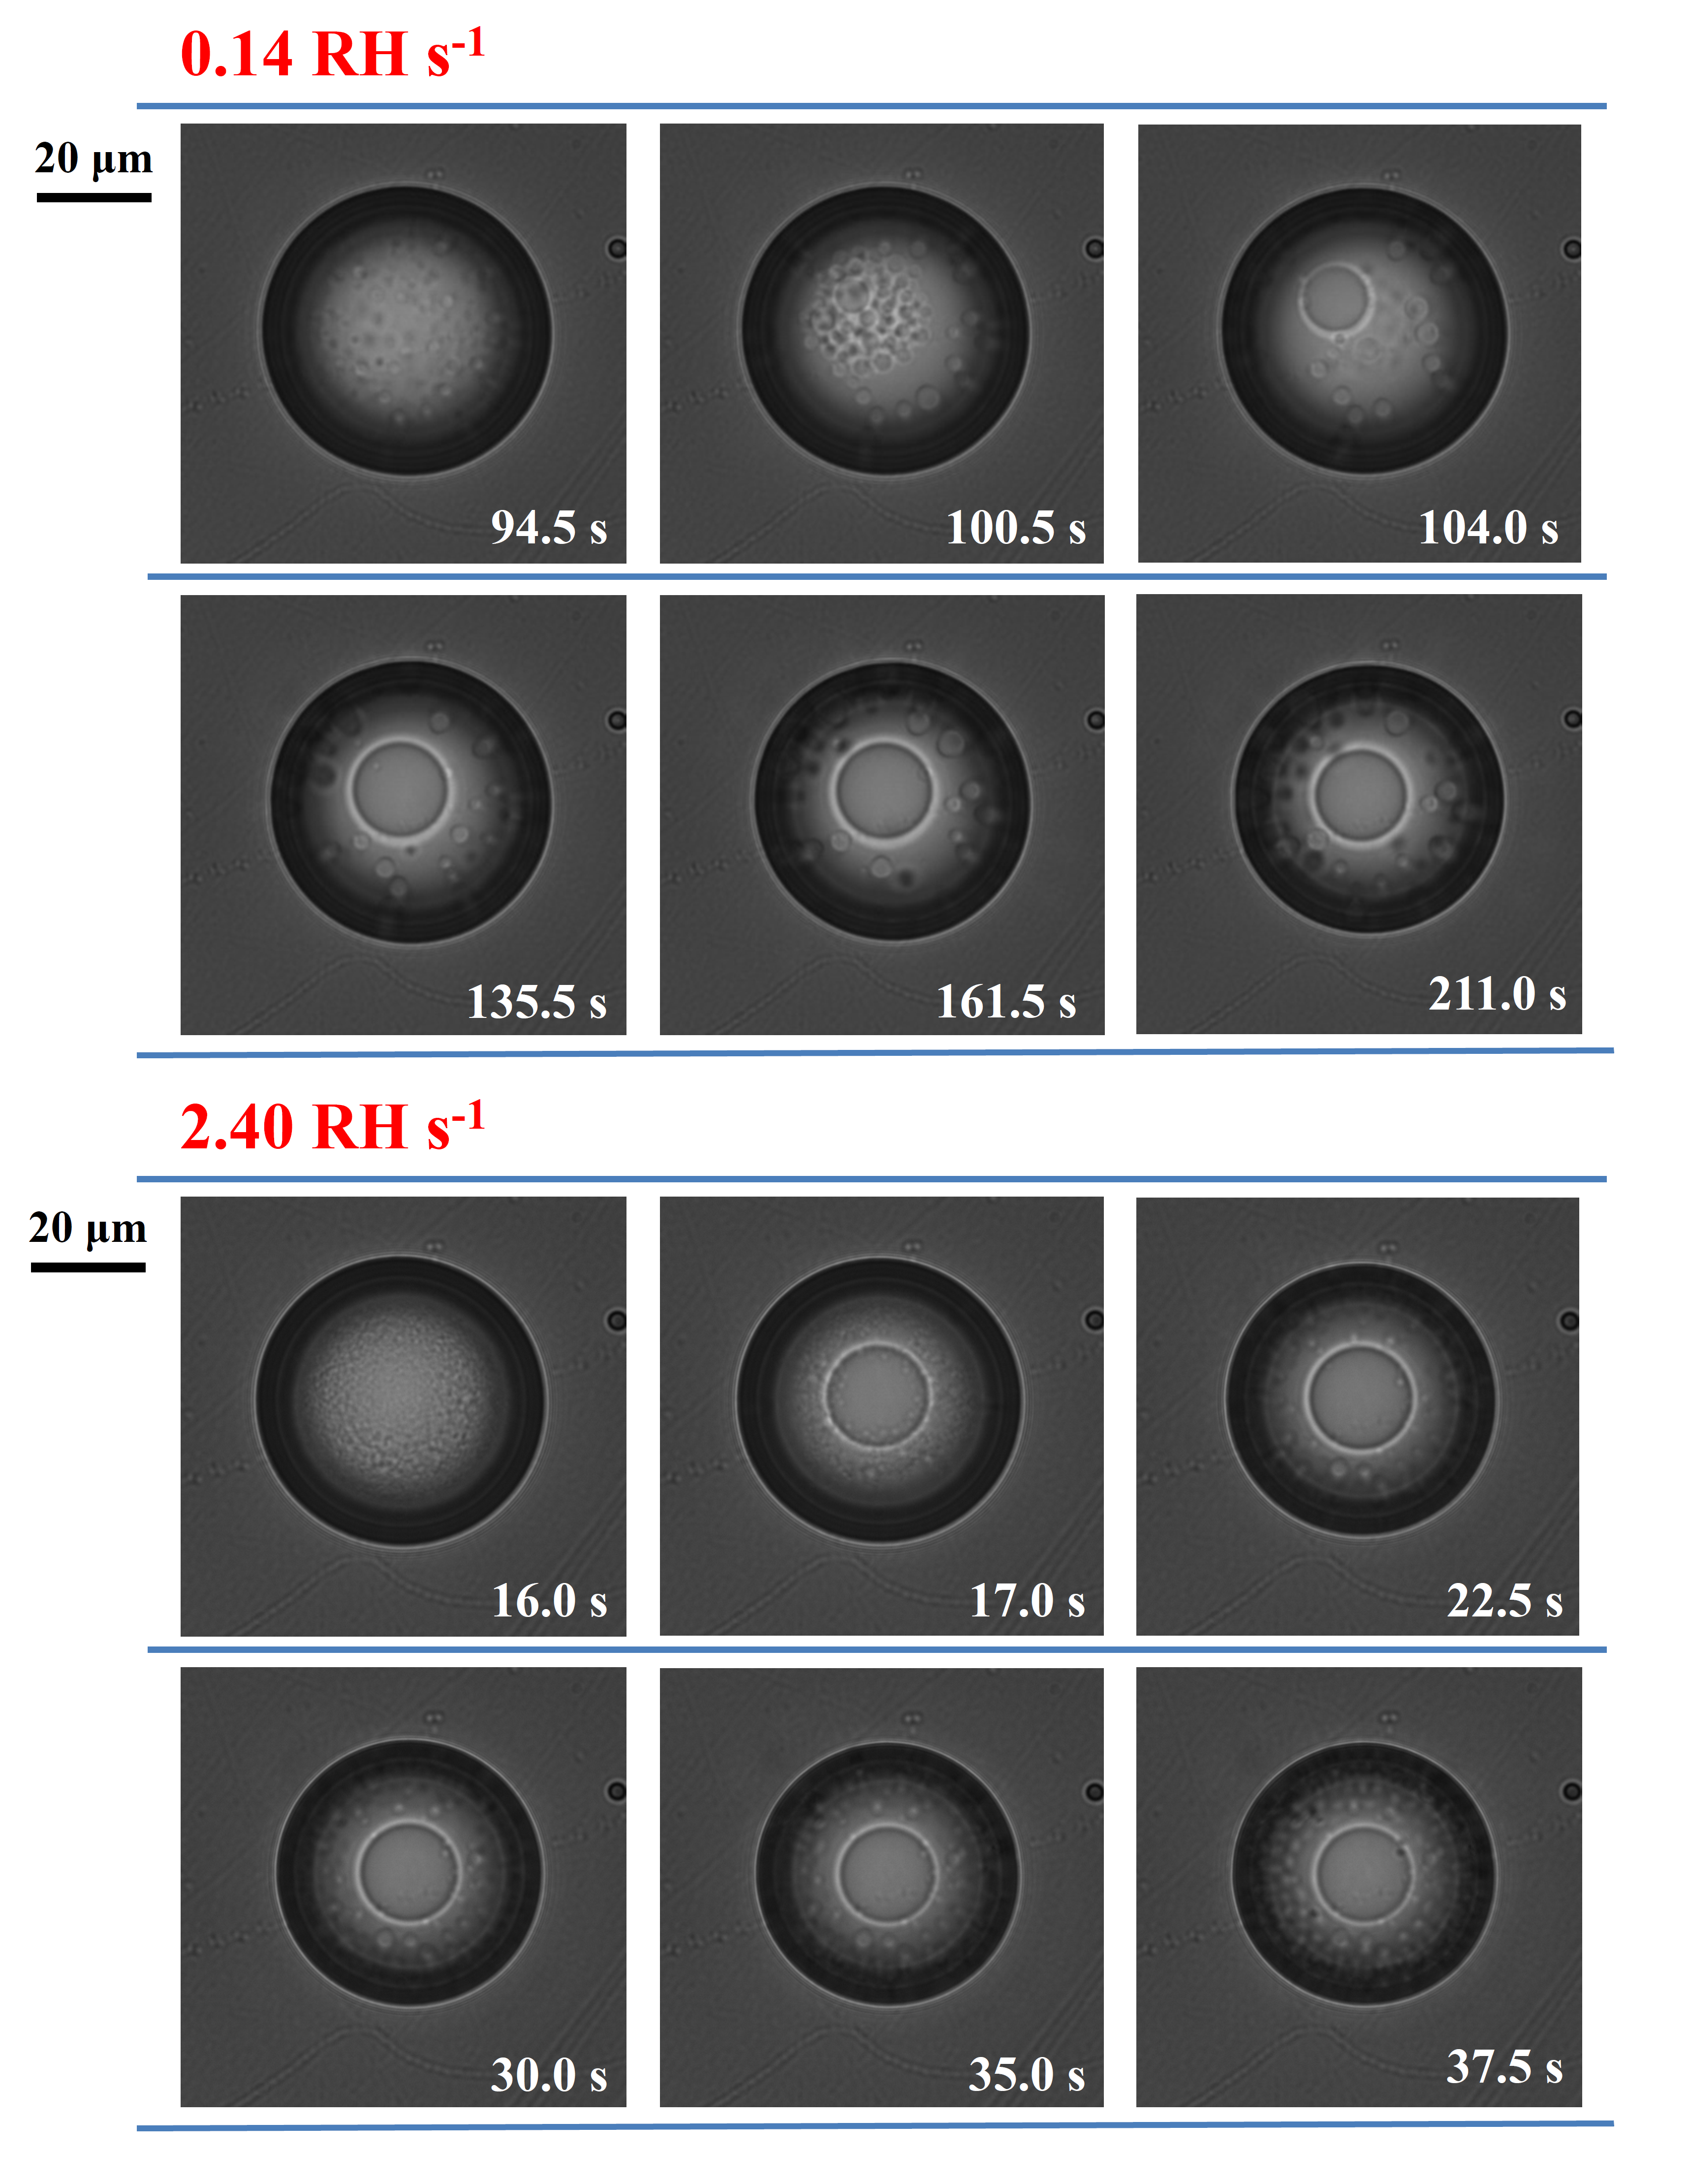


**Fig. S5.** Dynamic LLPS processes for OIR = 4:1 particles under two RH changing rates (0.14 RH s-1 and 2.40 RH s-1).

**Fig. S6.** DRH, SRH and ERH of mixed 1, 2, 6-hexanetriol/AS particles with different OIRs. The blue dash line represents the theoretical DRH of pure AS from EAIM (Extended Aerosol Inorganic Model). The black dash line shows the measured mean SRH from Bertram et al. The red dash line represents the boundary of typical ERH for heterogeneous nucleation of AS.

**Table S1.** Measured DRH, SRH and ERH of mixed 1, 2, 6-hexanetriol/AS particles with five different OIRs in this study and comparison with the SRH values from Bertram et al.

| **this study** | | | | **Bertram et al.** | |
| --- | --- | --- | --- | --- | --- |
| **OIRs** | **ERH (%)** | **DRH (%)** | **SRH (%)** | **Organic : sulfate** | **SRH (%)** |
| 1:4 | 45.9 | 79.9 | 77.9 | 0.355 | 70.3 |
| 1:2 | 42.0 | 78.1 | 73.4 | 0.945 | 69.0 |
| 1:1 | 47.2 | 79.6 | 78.9 | 2.127 | 72.5 |
| 2:1 | 43.3 | 76.1 | 73.7 | 5.673 | 71.6 |
| 4:1 | 50.7 | 75.4 | 76.4 |  |  |

**Movies S1-S4.** LLPS, secondary LLPS, efflorescence, and deliquescence processes of the OIR = 1:1 particle, respectively.

**Movies S5-S7.** LLPS, secondary LLPS, and efflorescence processes of the OIR = 1:4 particle, respectively.

**Movies S8-S10.** LLPS, secondary LLPS, and efflorescence processes of the OIR = 1:2 particle, respectively.

**Movies S11 and S12.** LLPS and efflorescence processes of the OIR = 2:1 particle, respectively.

**Movies S13 and S14.** LLPS and efflorescence processes of the OIR = 4:1 particle, respectively.

1. * Email: sfpang@bit.edu.cn, yhz@bit.edu.cn Phone:86-10-68913596 Fax:86-10-68913596 [↑](#footnote-ref-1)
2. [↑](#footnote-ref-2)
